# Supplementary material for: Acute Effects of Beetroot Juice Supplements on Resistance Training: A Randomized Double-Blind Crossover
Source: Nutrients. 2020 Jun 28;12(7):1912. doi: 10.3390/nu12071912 (PMC7401280; doi:10.3390/nu12071912)
Supplement: Supplementary file 1 [file nutrients-12-01912-s001.pdf]

**Supplementary Table S1.** Post-exercise BJ supplement identification responses

|                        | Correct | Don't know | Wrong |
|------------------------|---------|------------|-------|
| N*                     | 8       | 2          | 2     |
| BJ IDENTIFICATION (%)* | 66%     |            |       |

BJ: beetroot juice. \*The answers presented are shown for BJ and not for PLA, because if the participants changed their answer on the second test day, this last answer was taken into account.
